# Supplementary material for: Whole genome sequencing enables new genetic diagnosis for inherited retinal diseases by identifying pathogenic variants
Source: PubMed Central journal article supplement (PMC10799956; doi:10.1038/s41525-024-00391-2), 2024-01-20
Supplement: 41525_2024_391_MOESM2_ESM.pdf [file 41525_2024_391_MOESM2_ESM.pdf]

## Reporting Summary

Nature Portfolio wishes to improve the reproducibility of the work that we publish. This form provides structure for consistency and transparency in reporting. For further information on Nature Portfolio policies, see our [Editorial Policies](#) and the [Editorial Policy Checklist](#).

### Statistics

For all statistical analyses, confirm that the following items are present in the figure legend, table legend, main text, or Methods section.

- | n/a                                 | Confirmed                                                                                                                                                                                                                                                                                      |
|-------------------------------------|------------------------------------------------------------------------------------------------------------------------------------------------------------------------------------------------------------------------------------------------------------------------------------------------|
| <input type="checkbox"/>            | <input checked="" type="checkbox"/> The exact sample size ( $n$ ) for each experimental group/condition, given as a discrete number and unit of measurement                                                                                                                                    |
| <input checked="" type="checkbox"/> | <input type="checkbox"/> A statement on whether measurements were taken from distinct samples or whether the same sample was measured repeatedly                                                                                                                                               |
| <input type="checkbox"/>            | <input checked="" type="checkbox"/> The statistical test(s) used AND whether they are one- or two-sided<br><i>Only common tests should be described solely by name; describe more complex techniques in the Methods section.</i>                                                               |
| <input checked="" type="checkbox"/> | <input type="checkbox"/> A description of all covariates tested                                                                                                                                                                                                                                |
| <input type="checkbox"/>            | <input checked="" type="checkbox"/> A description of any assumptions or corrections, such as tests of normality and adjustment for multiple comparisons                                                                                                                                        |
| <input type="checkbox"/>            | <input checked="" type="checkbox"/> A full description of the statistical parameters including central tendency (e.g. means) or other basic estimates (e.g. regression coefficient) AND variation (e.g. standard deviation) or associated estimates of uncertainty (e.g. confidence intervals) |
| <input checked="" type="checkbox"/> | <input type="checkbox"/> For null hypothesis testing, the test statistic (e.g. $F$ , $t$ , $r$ ) with confidence intervals, effect sizes, degrees of freedom and $P$ value noted<br><i>Give <math>P</math> values as exact values whenever suitable.</i>                                       |
| <input checked="" type="checkbox"/> | <input type="checkbox"/> For Bayesian analysis, information on the choice of priors and Markov chain Monte Carlo settings                                                                                                                                                                      |
| <input checked="" type="checkbox"/> | <input type="checkbox"/> For hierarchical and complex designs, identification of the appropriate level for tests and full reporting of outcomes                                                                                                                                                |
| <input checked="" type="checkbox"/> | <input type="checkbox"/> Estimates of effect sizes (e.g. Cohen's $d$ , Pearson's $r$ ), indicating how they were calculated                                                                                                                                                                    |

*Our web collection on [statistics for biologists](#) contains articles on many of the points above.*

### Software and code

Policy information about [availability of computer code](#)

Data collection

Data analysis

For manuscripts utilizing custom algorithms or software that are central to the research but not yet described in published literature, software must be made available to editors and reviewers. We strongly encourage code deposition in a community repository (e.g. GitHub). See the Nature Portfolio [guidelines for submitting code & software](#) for further information.

### Data

Policy information about [availability of data](#)

All manuscripts must include a [data availability statement](#). This statement should provide the following information, where applicable:

- Accession codes, unique identifiers, or web links for publicly available datasets
- A description of any restrictions on data availability
- For clinical datasets or third party data, please ensure that the statement adheres to our [policy](#)

Whole-genome sequencing data from the current study are subject to conditions of Ministry of Science and Technology (China) policies on the management of human genetic resources under which the data was generated, and therefore the raw sequencing data is unavailable. These datasets can only become available upon a data sharing agreement approved by Ministry of Science and Technology (China). The additional variant requests or other data can be obtained from the corresponding author on reasonable request.

## Research involving human participants, their data, or biological material

Policy information about studies with [human participants or human data](#). See also policy information about [sex, gender \(identity/presentation\), and sexual orientation](#) and [race, ethnicity and racism](#).

|                                                                    |                                                                                                                                                                                                                                                                                                                                                                                                                                                                                                             |
|--------------------------------------------------------------------|-------------------------------------------------------------------------------------------------------------------------------------------------------------------------------------------------------------------------------------------------------------------------------------------------------------------------------------------------------------------------------------------------------------------------------------------------------------------------------------------------------------|
| Reporting on sex and gender                                        | They are not been considered in study design and our article does not cover this part.                                                                                                                                                                                                                                                                                                                                                                                                                      |
| Reporting on race, ethnicity, or other socially relevant groupings | Our article does not cover this part.                                                                                                                                                                                                                                                                                                                                                                                                                                                                       |
| Population characteristics                                         | Chinese population with inherited retinal diseases. The average age of the probands was 35 years (range 8–58 years old) and the average age of onset was 15.0 years (range 2–50 years old).                                                                                                                                                                                                                                                                                                                 |
| Recruitment                                                        | A total of 271 IRD patients and their available family members (n=646) were enrolled at Fudan University Eye Ear Nose and Throat Hospital from 2019 to 2020. All cases included in this study underwent a comprehensive ophthalmic examination and were given the diagnosis of IRDs by a professional ophthalmologist.<br><br>No potential self-selection bias or other biases are present.                                                                                                                 |
| Ethics oversight                                                   | Our research was approved by the Medical Ethics Committee of Fudan University Eye Ear Nose and Throat Hospital and in accordance with World Medical Association Code of Ethics on medical research involving human subjects (Declaration of Helsinki). Informed consent was signed by all subjects or parents on behalf of minors. Our study is performed in strict accordance with the 'Guidance of the Ministry of Science and Technology (MOST) for the Review and Approval of Human Genetic Resources'. |

Note that full information on the approval of the study protocol must also be provided in the manuscript.

## Field-specific reporting

Please select the one below that is the best fit for your research. If you are not sure, read the appropriate sections before making your selection.

Life sciences       Behavioural & social sciences       Ecological, evolutionary & environmental sciences

For a reference copy of the document with all sections, see [nature.com/documents/nr-reporting-summary-flat.pdf](https://nature.com/documents/nr-reporting-summary-flat.pdf)

## Life sciences study design

All studies must disclose on these points even when the disclosure is negative.

|                 |                                                                                                                                                                                                                                                                                                                           |
|-----------------|---------------------------------------------------------------------------------------------------------------------------------------------------------------------------------------------------------------------------------------------------------------------------------------------------------------------------|
| Sample size     | A total of 271 IRD patients and their available family members (n=646) were enrolled. All patients underwent an initial test with panel-based sequencing, but the genetic diagnosis was inconclusive. So, we performed WGS sequencing on these patients and relevant family members to identify both SNVs/indels and SVs. |
| Data exclusions | No data were excluded from the analyses.                                                                                                                                                                                                                                                                                  |
| Replication     | The reproducibility of the minigene experimental findings has been verified. The results of minigene were confirmed by gel electrophoresis and Sanger sequencing simultaneously.                                                                                                                                          |
| Randomization   | The item is not relevant to our study.                                                                                                                                                                                                                                                                                    |
| Blinding        | The item is not relevant to our study.                                                                                                                                                                                                                                                                                    |

## Reporting for specific materials, systems and methods

We require information from authors about some types of materials, experimental systems and methods used in many studies. Here, indicate whether each material, system or method listed is relevant to your study. If you are not sure if a list item applies to your research, read the appropriate section before selecting a response.

## Materials & experimental systems

| n/a                                 | Involvement in the study                               |
|-------------------------------------|--------------------------------------------------------|
| <input checked="" type="checkbox"/> | <input type="checkbox"/> Antibodies                    |
| <input checked="" type="checkbox"/> | <input type="checkbox"/> Eukaryotic cell lines         |
| <input checked="" type="checkbox"/> | <input type="checkbox"/> Palaeontology and archaeology |
| <input checked="" type="checkbox"/> | <input type="checkbox"/> Animals and other organisms   |
| <input checked="" type="checkbox"/> | <input type="checkbox"/> Clinical data                 |
| <input checked="" type="checkbox"/> | <input type="checkbox"/> Dual use research of concern  |
| <input checked="" type="checkbox"/> | <input type="checkbox"/> Plants                        |

## Methods

| n/a                                 | Involvement in the study                        |
|-------------------------------------|-------------------------------------------------|
| <input checked="" type="checkbox"/> | <input type="checkbox"/> ChIP-seq               |
| <input checked="" type="checkbox"/> | <input type="checkbox"/> Flow cytometry         |
| <input checked="" type="checkbox"/> | <input type="checkbox"/> MRI-based neuroimaging |

## Plants

Seed stocks

The item is not relevant to our study.

Novel plant genotypes

The item is not relevant to our study.

Authentication

The item is not relevant to our study.
